# Supplementary material for: Investigation of the relationship between drinking water quality and landform classes using fuzzy AHP (case study: south of Firozabad, east of Fars province, Iran)
Source: Copernicus journal article supplement (doi:10.5194/dwes-2016-3), 2016-06-09
Supplement: Supplementary file [file dwes-2016-3-AC2-supplement.pdf]

## **Author's Response**

**Dear Editor**

1) Change "drinking water quality" to "inorganic components in drinking water" in the title and in the manuscript.

We changed it in all of the text.

2) The grammatical errors should be thoroughly checked and corrected.

It was corrected
